1           **TITLE:**

2           Plant resistance to drought relies on early stomatal closure

3           **AUTHORS:**

4           Martin-StPaul N<sup>1</sup>, Delzon S<sup>2</sup>; Cochard H<sup>3</sup>

5           **AFFILIATIONS:**

6           1- URFM, INRA, 84000 Avignon, France

7           2- BIOGECO, INRA, Univ. Bordeaux, 33615 Pessac, France

8           3- PIAF, INRA, UCA, 63000 Clermont-Ferrand, France

9

10          **ABSTRACT:**

11          Plant resistance to drought has long been thought to be associated with the ability to maintain  
12          transpiration and photosynthesis longer during drought, through the opening of stomata. This premise  
13          is at the root of most current framework used to assess drought impacts on land plants in vegetation  
14          models. We examined this premise by coupling a meta-analysis of functional traits of stomatal response  
15          to drought (i.e. the water potential causing stomatal closure,  $\psi_{\text{close}}$ ) and embolism resistance (the water  
16          potential at the onset of embolism formation,  $\Psi_{12}$ ), with simulations from a soil-plant hydraulic model.  
17          We found that  $\psi_{\text{close}}$  and  $\Psi_{12}$  were equal (isometric) only for a restricted number of species, but as  $\Psi_{12}$   
18          decreases, the departure from isometry increases, with stomatal closure occurring far before embolism  
19          occurs. For the most drought resistant species ( $\Psi_{12} < -4.2$  MPa),  $\psi_{\text{close}}$  was remarkably independent of  
20          embolism resistance and remained above -4.5 MPa, suggesting the existence of a restrictive boundary  
21          by which stomata closure must occur. This pattern was supported by model simulations. Indeed,  
22          coordinated decrease in both  $\psi_{\text{close}}$  and  $\psi_{12}$  leads to unsuspected accelerated death under drought for  
23          embolism resistant species, in contradiction with observations from drought mortality experiments.  
24          Overall our results highlight that most species have similarity in stomatal behavior, and are highly  
25          conservative in terms of their water use during drought. The modelling framework presented here  
26          provides a baseline to simulate the temporal dynamic leading to mortality under drought by accounting  
27          for multiple, measurable traits.

28

29

30

31

## 32 INTRODUCTION

33           Recent drought episodes have been identified as the triggers for widespread plant mortality  
34 events around the world [1–3]. They have had huge consequences for the productivity of the land [4]  
35 and have undoubtedly affected a panel of ecosystem services [5]. Identifying the mechanisms and traits  
36 underlying drought resistance is essential to understanding and predicting the impact of widespread  
37 droughts over many land areas. Experimental studies have provided empirical evidence that the failure  
38 of the water transport system is tightly linked to tree dehydration and mortality in drought conditions.  
39 This was confirmed by a recent study reporting that global patterns of mortality was predictable from  
40 hydraulic safety margins[6]. Two key types of traits shaping the trade-off between drought resistance  
41 and the maximization of carbon dioxide assimilation have been identified: hydraulic traits ensuring the  
42 integrity of the hydraulic system under drought [7], and stomatal traits controlling gas exchanges at the  
43 leaf surface [8]. However, efforts to model tree mortality in response to drought is still hindered by a lack  
44 of understanding of how these traits interact to define physiological dysfunctions under drought stress  
45 [9]. In this study, we analyzed the overall connections between these two types of traits for the full range  
46 of drought resistance, with a soil-plant hydraulic model.

47           The stomata have two key functions: controlling transpiration, which supplies nutrients and  
48 regulates leaf temperature, and controlling the entry of CO<sub>2</sub> into the leaf. Stomatal closure in response  
49 to water deficit is the primary limitation to photosynthesis [10], and constitutes a key cost in terms of  
50 plant growth and leaf temperature under drought conditions. However, stomatal closure also limits  
51 excessive decreases in water potential (quantified as a negative pressure,  $\psi$ ) in the plant, thereby  
52 ensuring that the water demand from the leaves does not exceed the supply capacity of the hydraulic  
53 system, which would lead to embolism of the vascular system and complete dehydration of the plant.  
54 These key, but opposing roles of stomata in regulating CO<sub>2</sub> influx and H<sub>2</sub>O loss pose a dilemma that has  
55 occupied scientists for centuries <sup>1</sup> and has led to the view that plant stomata probably operate at the  
56 edge of the supply capacity of the plant's hydraulic system, to balance different cost such as productivity  
57 leaf temperature regulation during drought [11,12].

58           Conversely, maintenance of the supply capacity of the hydraulic system depends on the ability  
59 of a species to sustain high negative pressure to limit embolism. Embolism resistance is usually  
60 quantified by the value of  $\psi$  causing 50% embolism ( $\Psi_{50}$ ), and the rate of embolism spread per unit drop  
61 in water potential (*slope*). From these two traits the  $\Psi$  at the onset embolism formation can be computed  
62 ( $\Psi_{12}$ , see equations 1 to 3), which give a more conservative functional limit to the hydraulic system.  
63 Embolism resistance varies considerably between species and with the dryness of species habitat  
64 [7,13,14]. A recent study has suggested that hydraulic systems highly resistant to embolism have  
65 evolved in response to the selective pressure associated with increasing drought levels during a  
66 paleoclimatic crisis [15]. Some contemporary plants have extremely drought-resistant vascular systems,  
67 with  $\Psi_{50}$  values reaching -19 MPa [16].

68           These findings have led to the suggestion that an efficient match between the capacity of the  
69 hydraulic system to sustain water deficit (*i.e.* embolism resistance) and the regulation of demand by the

70 stomata is a prerequisite for the maximization of gas exchanges without dehydration [11,17–19]. This  
71 notion naturally leads to the hypothesis that stomatal behavior and embolism resistance have followed  
72 a similar evolutionary trajectory under drought constraints, and that plants have increased their intrinsic  
73 embolism resistance to allow stomata to close later during drought, thereby maximizing plant productivity  
74 [8,12,20]. The coordination of stomatal and hydraulic traits and their role in shaping drought resistance  
75 has yet to be addressed on a global scale. This would help to clarify the interplay between mechanisms  
76 and plant traits in defining the physiological dysfunctions occurring under drought stress, which remains  
77 one of the principal challenge faced in the modeling of tree mortality in response to drought.

78 In this study we gathered stomatal regulation traits and embolism resistance traits for different  
79 species. We compiled  $\psi_{12}$ ,  $\psi_{50}$  and *slope* values derived from stem vulnerability curves published by us  
80 during the past 20 years, representing 151 species from different biomes (Tables S1). Recent direct  
81 observations of embolism formation by mean of X-ray tomography [21–24] confirmed the reliability of  
82 these values. For those species, we performed a search for data of water potential causing stomatal  
83 closure ( $\Psi_{\text{close}}$ ). We used concurrent measurements of gas exchange and leaf water potential, from  
84 which the  $\Psi$  value at 90% stomatal closure was calculated following [8,20]. Stomatal opening increases  
85 with guard cell turgor pressure [25–27], thus, we also used leaf water potential at turgor loss ( $\Psi_{\text{tip}}$ ) as a  
86 surrogate for  $\Psi_{\text{close}}$ . We then explored the range of variation and the coordination between  $\Psi_{\text{close}}$  and  
87  $\psi_{50}$ . Finally, we used a soil-plant water transport model to elucidate how different associations between  
88  $\Psi_{\text{close}}$  and  $\psi_{50}$  determine the time until hydraulic failure during drought (see Methods). We validated  
89 model predictions using empirical data for time to shoots death collected in drought mortality  
90 experiments[28–31] (see Methods and Appendix 1).

## 91 RESULTS AND DISCUSSION

92 Embolism resistance (taken as the  $\psi_{50}$ ) ranged between -1.3 and -19 MPa (Figure 1 A). The  
93 large variations of  $\psi_{50}$  were partly related to changes of the *slope* which was non linearly related to the  
94  $\psi_{50}$  (Figure 1 A, insert). Both the  $\psi_{50}$  and *slope* determined the value of the water potential causing the  
95 onset of embolism ( $\psi_{12}$ , equation 3). This more conservative indicator of embolism resistance ranged  
96 between -0.7 and -14 MPa. The two indicators of water potential causing stomatal closure ( $\Psi_{\text{close}}$ ) were  
97 significantly related between each other with a slope close to one as previously reported [20]  
98 (p.value<0.01 Figure 1b insert).  $\Psi_{\text{close}}$  was thus taken as the average value when the two traits were  
99 found. By contrast to embolism resistance,  $\Psi_{\text{close}}$  varied from -1. to -4.3MPa, spanning a three times  
100 lower range of variation than embolism resistance (Figure 1 A & B), in agreement with recent meta-  
101 analysis [20].

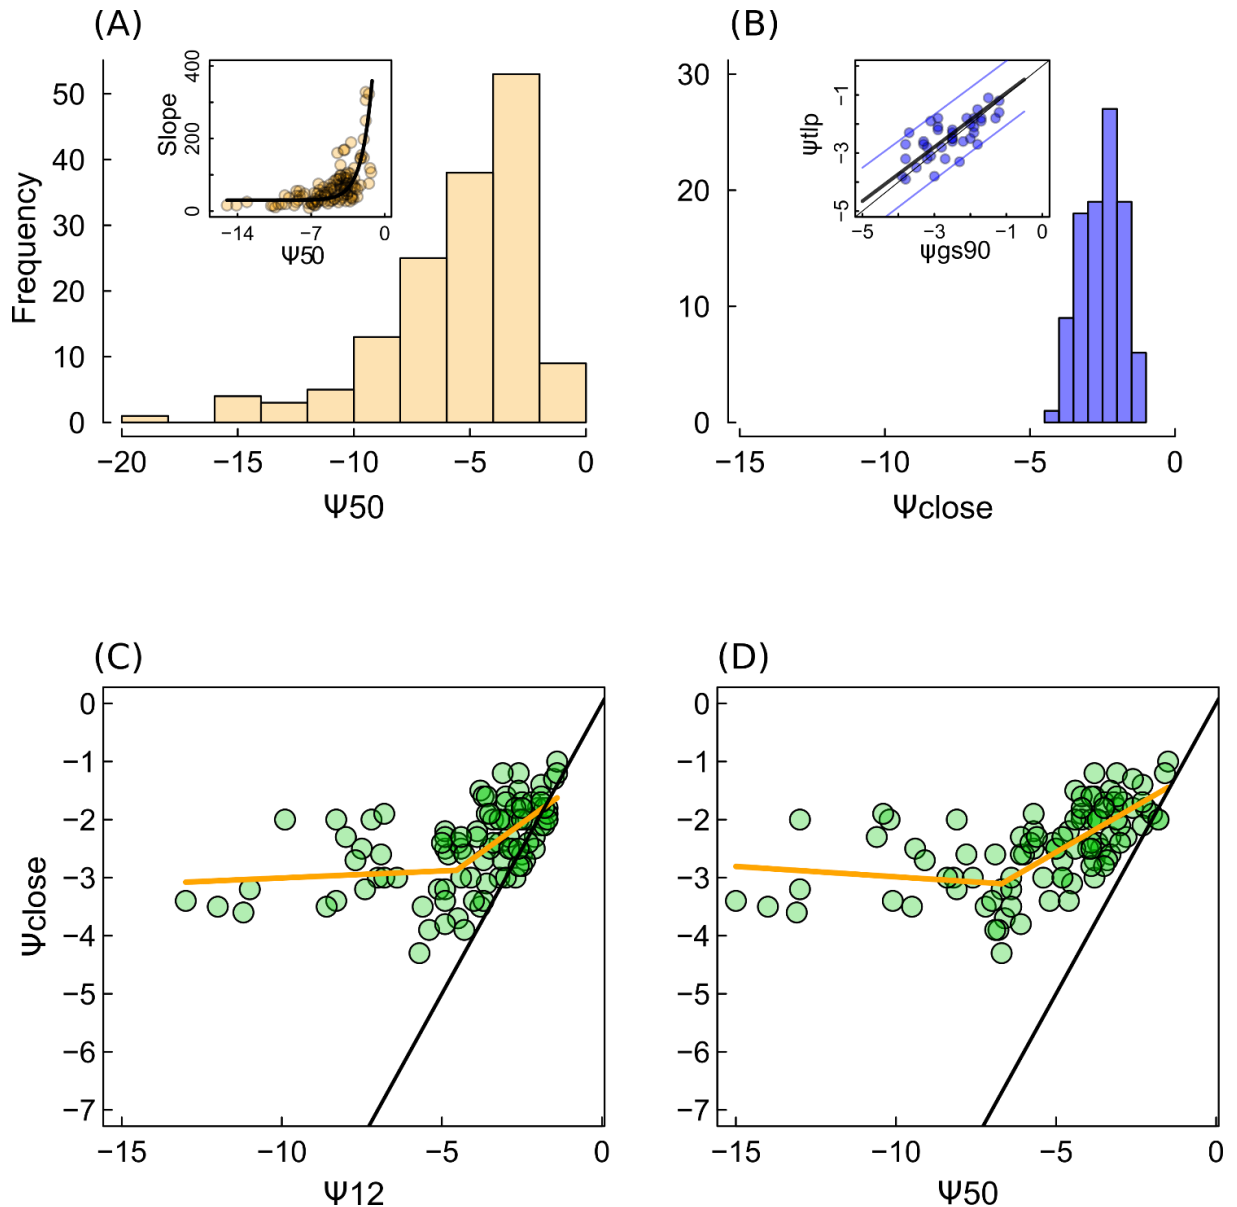

102

103 **Figure 1:** Range of variation of embolism resistance ( $\Psi_{50}$ ) and stomatal response to drought ( $\Psi_{close}$ ),  
 104 and their covariation, showing that these two traits do not covary isometrically. (A) Distribution of  
 105 embolism resistance ( $\Psi_{50}$ ) among plants. The insert shows the relationship between the *slope* of the  
 106 vulnerability curve (%/MPa, equation 2) and  $\Psi_{50}$ , that allows to compute  $\Psi_{12}$  (MPa). The best fit was  
 107 obtained with  $slope = 16 + e^{(\Psi_{50})} \times 1092$ , the fitted parameters were significantly different from 0  
 108 (P.value<0.01). (B) Distribution of the water potential causing stomatal closure ( $\Psi_{close}$ ). The relationship  
 109 between the two different traits for  $\Psi_{close}$  (the water potential causing 90% stomatal closure,  $\Psi_{gs90}$ ) and  
 110 the water potential causing leaf turgor loss ( $\Psi_{tip}$ ) is shown in the inset with fitted line ( $\Psi_{tip} = 0.97 \times \Psi_{gs90}$ ,  
 111 p.value<0.01,  $R^2 = 0.4$ ) and the 95% confidence interval. (C) The relationship between  $\Psi_{close}$  and  $\Psi_{12}$ , and  
 112 (D) relationship between  $\Psi_{close}$  and  $\Psi_{50}$ . Points are individual species and the orange line is the best fit  
 113 with a segmented regression, showing a significant break point for  $\Psi_{50}$  of -5.9 MPa or  $\Psi_{12}$  of -4.2 MPa  
 114 corresponding to an average  $\Psi_{close}$  of ca. -3 MPa ( $\pm 1.5$  MPa, 95%CI).

115

116 The relationship between  $\Psi_{12}$  and  $\Psi_{close}$  did not follow the isometric line (i.e. the 1:1 line, Figure  
 117 1c), but had a slope lower than unity : 0.4 for species with low embolism resistance ( $\Psi_{12} > -4.2$ ) and null  
 118 for drought resistant species (For  $\Psi_{12} < -4.2$ , p.value=0.4). This contradicts the expected match between

119  $\Psi_{12}$  and  $\Psi_{close}$  and indicates that the departure between  $\Psi_{12}$  and  $\Psi_{close}$  increase with increasing embolism  
120 resistance. These results were confirmed when we used  $\Psi_{50}$  as an indicator of embolism resistance  
121 (Figure 1 D, Table S2). The relationship between  $\Psi_{close}$  and embolism resistance ( $\Psi_{50}$ ,  $\Psi_{12}$ ) presented  
122 a marked interruption (i.e. for  $\Psi_{12}$  of -4.2 or  $\Psi_{50}$  ca.-6 MPa) corresponding to  $\Psi_{close} = -3$  Mpa on average  
123 (Figure 1 C, Figure 1 D and Table S2). Overall, these results indicate that stomatal closure always occurs  
124 at much higher water potential value than the one triggering embolism and that the difference between  
125  $\Psi_{close}$  and  $\Psi_{50}$  increases continuously with increasing embolism resistance. Contrasting the  
126 hypothesized coordination between stomatal closure and embolism resistance, our finding supports a  
127 similarity in stomatal behavior particularly among embolism resistant species, and indicates that most  
128 species are highly conservative in terms of their water use during drought.

129 The similarity of stomatal behavior between species suggests that keeping stomata open is not  
130 beneficial in terms of fitness, particularly for survival under drought conditions. To get more insights into  
131 the relationship between stomatal function and plant resilience to drought, we developed a soil plant-  
132 hydraulic model (see *Methods*) computing the survival times under drought conditions (i.e. the time to  
133 hydraulic failure) for the range of hypothetical species covering the full spectrum of embolism resistance.  
134 We used three different postulates to assess stomatal behavior (Figure 2 A, see *Methods* and Appendix  
135 2). Firstly (hypothesis 1), we assumed that stomata do not close to regulate transpiration ( $E$ ) during  
136 drought (i.e. stomata are maintained open whatever the soil and plant water potential). Secondly, we  
137 assumed (hypothesis 2) that stomata regulate water losses to maintain plant water potential ( $\Psi_{plant}$ )  
138 above the water potential resulting in the onset of embolism (i.e.  $\Psi_{12}$ ), according to the premise that the  
139 integrity of the hydraulic system is functionally linked to stomatal closure in response to drought. This  
140 was done by reducing  $E$  to a residual term ( $E_{min}$ ) when  $\Psi_{plant}$  approached  $\Psi_{12}$  (Appendix 4). Finally  
141 (hypothesis 3), we assumed that  $\Psi_{close}$  varied with  $\Psi_{50}$  until -3 MPa, independently of the hydraulic  
142 properties of the vascular system (orange line in Figure 2c), in accordance with the empirical average  
143 trend observed in our dataset (Figure 1 C). We simulated the  $E$  decline due to the progressive loss of  
144 turgor as water deficit increases, by inverting the pressure volume curve equations[32] (Appendix 3). At  
145 turgor loss point,  $E$  was reduced to  $E_{min}$ , as for hypothesis 2. We report on Figure 2b the relationships  
146 between survival time (time to hydraulic failure) and  $\Psi_{50}$  modeled for each of the three hypothesis. As a  
147 mean of validation, we compared these relationships with results from drought mortality experiments in  
148 which survival time increased with  $\Psi_{50}$  (Figure 2 C).

### A. Hypothetical stomatal behavior

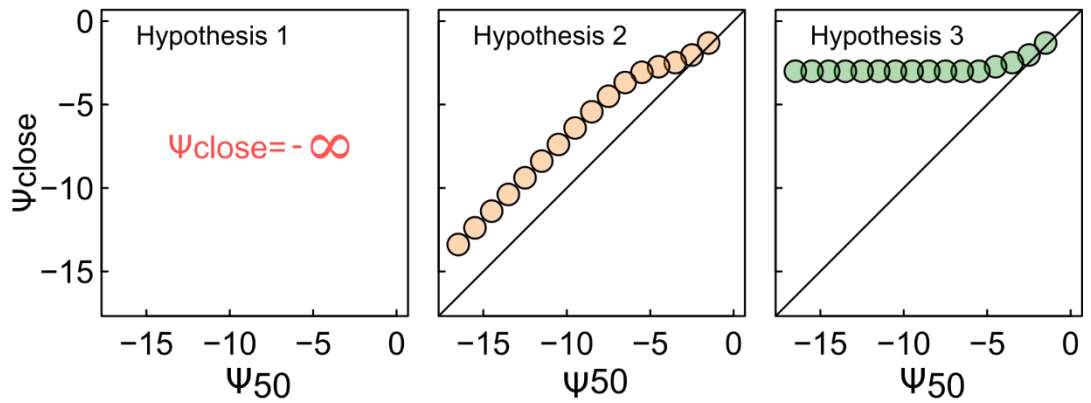

### B. Model results

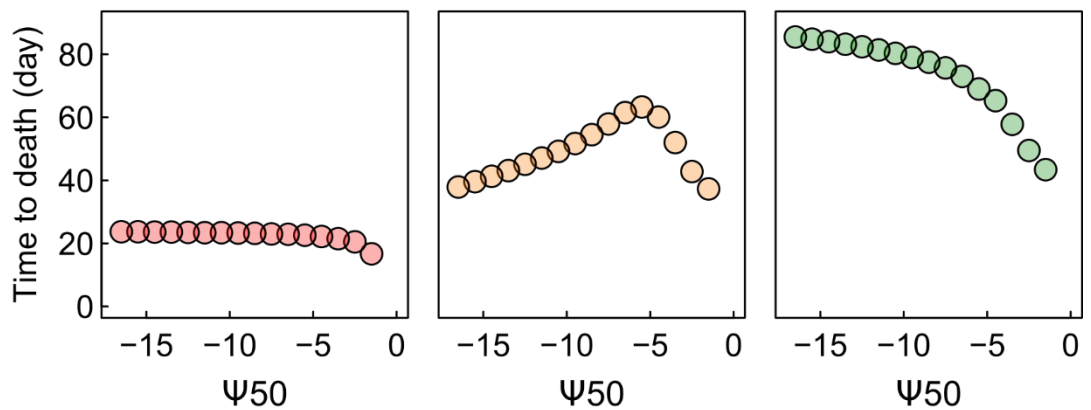

### C. Data of time to 50% shoots death (T50)

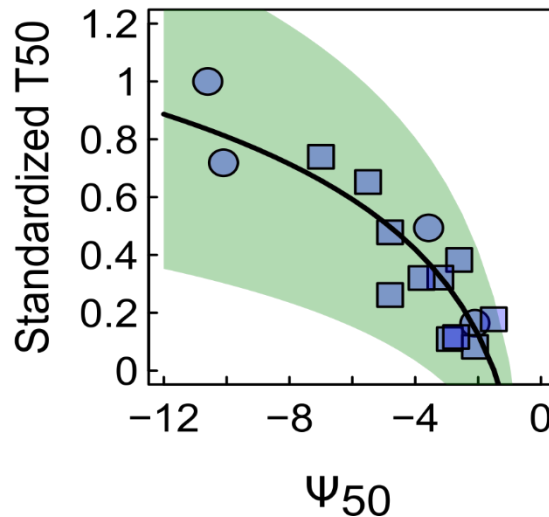

149

150 **Figure 2:** Model simulations of the survival time for the range of embolism resistance, under three  
 151 different hypothesis of stomata behaviour. (A) Representation of the parameters combinations for  $\Psi_{close}$   
 152 and  $\Psi_{50}$  used to represent the three hypothesis tested in the model: (Hypothesis 1) Stomata never close  
 153 (*i.e.* plants maintain maximal rates of transpiration at all soil and plant water potentials whatever their  
 154  $\Psi_{50}$ ). (hypothesis 2) Stomata regulate water losses to maintain plant water potential above the water  
 155 potential resulting in the onset of embolism (*i.e.* stomata close when water potential reaches  $\Psi_{12}$ ).  
 156 (hypothesis 3) Stomata closure and embolism resistance were not coordinated until -3MPa as indicated  
 157 by our empirical results (Figure 1c,d). (B) Simulated relationship between survival time (time until

158 hydraulic failure) and  $\Psi_{50}$  for each hypothesis tested. (C) Normalized time to 50% shoot death ( $T_{50}$ ) as  
159 a function of  $\Psi_{50}$  for 15 species. The data were gathered from four different studies and normalized to  
160 account for differences in soil and climate conditions across experiments (see *Methods*). The logarithmic  
161 relationship fitted on absolute values ( $0.42 \times \log(|\Psi_{50}|) - 0.16$ , slope  $p\text{-val} < 0.001$ ) is shown (line) with 95%  
162 CI (green area).

163

164 Hypotheses 1 and 2 were not consistent with the empirical observation that survival time  
165 increased with embolism resistance (Figure 2 C). By contrast, simulations imposing early stomatal  
166 closure (hypothesis 3) resulted in an increase in survival with embolism resistance (Figure 2 B).

167 Under hypothesis 1, plants would die very rapidly from hydraulic failure, with only a slight  
168 increase in survival when  $\Psi_{50}$  decreased from -1 to -6 MPa (Figure 2 C). For  $\Psi_{50}$  values below -6 MPa,  
169 increasing embolism resistance was not associated with a further increase in survival time, suggesting  
170 that increasing embolism resistance *per se* had only a marginal impact on survival under drought  
171 conditions. If water loss regulation was imposed to maintain  $\Psi_{\text{plant}}$  just above the level triggering  
172 embolism (hypothesis 2), survival time was much higher (Figure 2 B), and increased markedly with  
173 embolism resistance until  $\Psi_{50}$  reached -6 MPa. However, beyond this value, survival decreased  
174 substantially (Figure 2B), contrary to the trend observed in analyses of experimental induced mortality  
175 (Figure 2B). This increase in survival for at high  $\Psi_{50}$  ( $\Psi_{50} > -6\text{MPa}$ ), is in fact due to the maintenance of  
176  $\Psi_{12}$  (and thus of stomatal closure) at a constant of ca. -3 MPa because of the *slope* of the VC decrease  
177 with decreasing  $\Psi_{50}$  (Appendix A2-4, Figure A2-6). If the *slope* of the VC was maintained at a constant  
178 average value of 45%/MPa for all the  $\Psi_{50}$  tested, the model would simulate a constant decrease of  
179 survival with embolism resistance under this assumption (Appendix 2-2, Figure A2-2).

180 The survival peak simulated at a  $\Psi_{50}$  of -6 MPa (Figure 2 B) under this hypothesis, implies that  
181  $\Psi_{\text{close}}$  is about -3 MPa, corresponding to the mean limit for  $\Psi_{\text{close}}$  in our database. Consequently,  
182 assuming that  $\Psi_{\text{close}}$  does not covary with embolism resistance beyond  $\Psi_{\text{close}} = -3$  MPa (hypothesis 3),  
183 a positive relationship between survival and embolism resistance was predicted over the entire range of  
184  $\Psi_{50}$  (Figure 2 B), consistent with the empirical trend observed in drought mortality experiments (Figure  
185 2 A). These simulations provided support for the view that embolism resistance cannot increase survival  
186 unless the difference between embolism resistance and  $\Psi_{\text{close}}$  also increases.

187 An analysis of the modeled dynamics of soil and plant dehydration for two species with  
188 contrasting level of embolism resistance identified the physical mechanisms making early stomata  
189 closure a prerequisite for the avoidance of drought-induced mortality, even for embolism-resistant  
190 species (Figure 3). The relationship between soil water potential ( $\Psi_{\text{soil}}$ ) (and, hence, plant water  
191 potential) and soil water content ( $\Theta$ ) becomes nonlinear at relatively high value of  $\Psi_{\text{soil}}$  (Figure 3a and  
192 3b). Thus, the longer transpiration is maintained the sharpest are the rates of soil and plant water  
193 potential drops, leading to rapid death through hydraulic failure. The nonlinearity of the  $\Psi_{\text{soil}}$  ( $\Theta$ )  
194 relationship results from long-established physical laws [33,34] describing the changes in  $\Psi_{\text{soil}}$  and soil  
195 conductivity with soil water content. These laws are globally conserved among soil types (Appendix A4,  
196 Figure A4-1), providing support for the global scope of our findings.

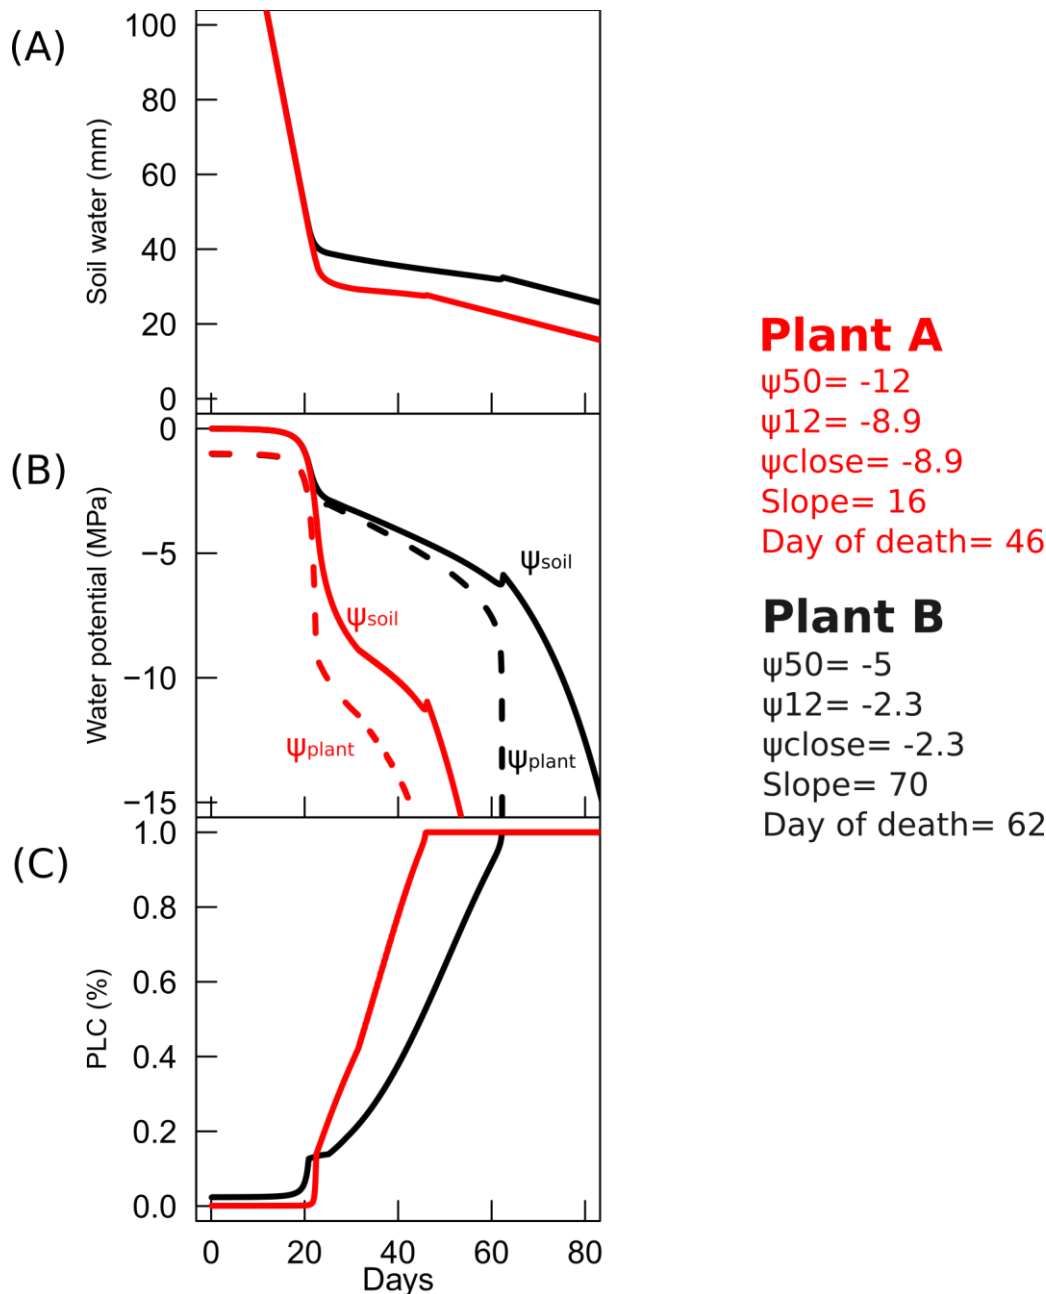

197

198 **Figure 3:** Simulated temporal dynamics of soil and plant dehydration assuming that stomata close when  
 199 water potential reaches  $\psi_{12}$  (hypothesis 2 in the text) for two contrasted species. (A) soil water content,  
 200 (B) soil and plant water potential and (C) the percent loss of conductivity caused by embolism.  
 201 Simulations were performed for two hypothetical plants (plant A and plant B) which traits are given in MPa  
 202 on the plot. The time to death by hydraulic failure (i.e. 100% embolism) is also indicated. Simulations  
 203 show that high levels of embolism resistance, and thus stomatal closure at lower water potential  
 204 accelerated death, because of faster water potential drops. More detailed simulation results are given  
 205 Appendix 2.

206

207 The vascular system of terrestrial plants has evolved toward very high levels of embolism  
 208 resistance ( $\psi_{50}$  values down to -19 MPa) allowing the colonization of dry environments<sup>21</sup>. Stomatal  
 209 closure was thought to have evolved along similar lines, to keep carbon assimilation levels for longer  
 210 periods, even at low xylem water potential. Different recent studies have moreover reported tight co-



211 variations between stomatal closure to drought and embolism resistance, but for relatively low drought  
212 resistant species [8,12,20]. Our results highlight that the range of variation of  $\Psi_{\text{close}}$  appears much  
213 reduced when seen in the light of the full range of embolism resistance. Such uncoupling between  
214 stomata closure and the failure of the vascular system may be the result of selection pressures that have  
215 favored survival under extreme water scarcity over growth under mild drought.

216 These findings provide a complementary view to the widely accepted framework for drought  
217 response strategies based on the water to carbon trade-off that plants have to face (e.g.[35][36]).  
218 According to this framework, plant drought response strategies fall in between two extreme categories  
219 called isohydric and anisohydric [8,35,37,38]. Isohydric plants close their stomata rapidly in response to  
220 drought, thereby maintaining a high water potential to limit embolism, but at the risk of death due to  
221 carbon starvation. Conversely, anisohydric plants keep their stomata open at low water potential,  
222 maintaining carbon assimilation levels, but at the cost of damage to the water transport system through  
223 embolism. This framework has been the focus of many scientific studies on drought-induced mortality in  
224 recent decades and has underpinned our understanding and modeling of drought induced plant mortality  
225 [35,36,39]. The fact that plants among the most drought resistant close their stomata at much higher  
226 potential than embolism can occur, indicates that resisting drought may not involve achieving further gas  
227 exchanges during drought conditions, but demonstrates on the contrary, that plants have to limit water  
228 potential drops as confirmed by the modelling analysis (Figure 2b).

229 The relative consistency of  $\Psi_{\text{close}}$  among plants may appear contradictory with the large  
230 variations in minimum water potential reported by different studies[6,7,38]. However, this may highlight  
231 the importance of accounting for the multiple traits driving the demand for water when stomata are close,  
232 if we want to represent water potential decline and thus, plant dehydration. For instance, the minimum  
233 conductance (i.e. when stomata are closed) or the leaf area must be important traits driving plant water  
234 potential decline. The hydraulic model presented is consistent with this view. Accordingly, model  
235 simulations indicated that there are two main stages defining the temporal sequence leading to plant  
236 dehydration in situations of water scarcity (Figure 3). The first step is defined by the time between the  
237 start of water shortage and stomatal closure. Its duration depends principally on the rate of water uptake,  
238 given the relative constancy of  $\Psi_{\text{close}}$  in plants and the competition between plants for water in community  
239 ecosystems. The second stage is defined by the time between stomatal closure and plant death (100%  
240 embolism). The duration of this stage depends on a set of drought resistance traits allowing plant tissues  
241 to retain water under very high tension, to decrease water loss when the stomata are closed and to limit  
242 the decrease in water potential during embolism through deeper rooting or the release of water for  
243 internal stores. It remains to be seen how these other different traits covary with embolism resistance,  
244 are coordinated and have coevolved in plants to shape the spectrum of drought adaptation strategies.

245 Overall, the model analysis presented in this study, demonstrates that multiple measurable  
246 drought resistance traits can be integrated into a consistent and thermodynamically reliable formal  
247 framework to define hydraulic failure. This modelling approach must be validated carefully against  
248 temporal dynamics of water potential, hydraulic conductance, proper embolism data and experimental

249 and field mortality for different species. However, it constitutes an important step towards assessing the  
250 consequences of drought in land plants and the effects of climate change on terrestrial ecosystem  
251 functions. It could also be a powerful tool for taking multiple traits into account in breeding strategies.  
252

## 253 MATERIALS AND METHODS

### 254 1- Data Meta-analysis

255 In this study we compiled embolism resistance traits and stomatal regulation traits from different  
256 species. We first compiled  $\psi_{12}$ ,  $\psi_{50}$  and slope values derived from stem vulnerability curves (i.e. the  
257 curve that relates the percent loss of conductivity to the xylem water potential) published by us during  
258 the past 20 years, representing 150 species from different biomes. Recent direct observations of  
259 embolism formation by mean of X-ray tomography confirmed the reliability of these values [21–23,40].  
260 All stem vulnerability curves were fitted with a sigmoidal function [41]:

$$PLC = \frac{1}{1 + e^{(a(\psi_{plant} - \psi_{50}))}} \quad (1)$$

261 Where  $PLC$  is the percent loss of embolism  $\psi$  is the xylem water potential,  $\psi_{50}$  is the water  
262 potential causing 50% loss of plant hydraulic conductivity and  $a$  is a shape parameter related to the rate  
263 of embolism spread per water potential drop. Equation 1 allows computing the 2 other parameters used  
264 in this study ( $\psi_{12}$ ,  $Slope$ ). A more intuitive way to represent  $a$  is to relate it to the derivative of the function  
265 at the inflexion point of the VC, in other word, the  $slope$  of the linear portion of the VC:

$$Slope = \frac{a \times 100}{4} \quad (1)$$

266 Where  $slope$  is expressed in  $\%.MPa^{-1}$ . From the  $slope$  and the  $\psi_{50}$ , the water potential at the  
267 onset of embolism, as defined by the xylem water pressure causing 12% loss of embolism, can also be  
268 computed:

$$\psi_{12} = \psi_{50} + \frac{50}{slope} \quad (2)$$

269 We managed to reassemble  $\psi_{50}$ ,  $\psi_{12}$  and  $slope$  parameters for 150 species (see Table S1). We  
270 did not considered root and leaf vulnerability curves, because it is still unclear what mechanism is  
271 responsible for the decline in hydraulic conductance measured with classical methods on these organs  
272 [42–45]. Therefore we focused our study on stem embolism that we consider being the main  
273 mechanisms responsible for extreme-drought induced mortality. We therefore neglected possible  
274 variations in embolism resistance among plant organs as we still don't know how general is this  
275 mechanism [20,44,46].

276 For all the species with available stem embolism resistance traits, we collected different traits  
277 indicating the level of plant water deficit ( $\Psi$ ) causing most stomatal closure (called  $\Psi_{close}$  in the main  
278 paper and hereafter). A first group of indicators was derived directly from gas exchange or transpiration  
279 measurements along with water potential data. A second indicator of  $\Psi_{close}$  was the bulk leaf water

280 potential causing turgor loss [27,47,48] that was derived from pressure volume curves or from osmotic  
281 pressure at full turgor.

282 We searched the literature for concurrent measurements of stomata conductance ( $g_s$ ) and leaf  
283 (or xylem) water potential to build  $g_s(\Psi)$  curves, following the approach of [8]. We then computed the  
284 water potential corresponding to 90% of stomatal closure ( $\Psi_{90g_s}$ ). Most of our  $g_s(\Psi)$  were based on  
285 diurnal dynamic of leaf water potential of  $g_s$  and  $\Psi_{\text{leaf}}$  or  $\Psi_{\text{xylem}}$  measurements over a drought period. In  
286 a few cases, however, we used data of concurrent measurements of water potential (leaf or xylem) and  
287 transpiration assessed through gravimetric methods (*i.e.* mass loss on detached leaves [49] or on potted  
288 plants [50] over a dehydration period obtained under constant relative humidity. To select the relevant  
289 literature, we primarily used the references provided in [8]. For each species individually, we also perform  
290 a google scholar search by using the key words “stomatal conductance” or “transpiration” AND “water  
291 potential” or “drought” or “water deficit” and the Latin name of the given species. We obtained in total,  
292 66 species for this trait. We then searched the literature for  $\psi_{\text{tip}}$  values. Most of them were derived from  
293 pressure volume curves [51,52], but for 10 species for which we no pressure volume curves available  
294 were found, we computed  $\psi_{\text{tip}}$  from the osmotic potential at full turgor ( $\pi_0$ ) using a linear relationship  
295 between  $\pi_0$  and  $\psi_{\text{tip}}$  following [53,54]. Overall, 40% of  $\psi_{\text{tip}}$  data (48 over 101 species) came from a  
296 previously published database[52], and the rest was collected from different published literature. We  
297 searched these data in google scholar, for each species for which no data were available from[52], we  
298 used the key words “osmotic potential” or “pressure volume curves” or “turgor loss point” AND the Latin  
299 name of the species. When only  $\pi_0$  was measured at different time of the season only the driest date  
300 (*i.e.* the lowest value of  $\pi_0$ ) was retained.

301 We studied the statistical associations between the different traits by using R (version 3.3.1),  
302 following a two-step procedure. First, we fitted a segmented regression to the scatter plot of  $\Psi_{\text{close}}$  (or its  
303 component  $\Psi_{\text{tip}}$  or  $\Psi_{g_s90}$ ) versus embolism resistance ( $\Psi_{50}$  or  $\Psi_{12}$ ) by using the package *segmented*.  
304 Then we identified (i) the break points in the x axis (*i.e.* the embolism resistance value at which there is  
305 a change in the co-variation between  $\Psi_{\text{close}}$  and embolism resistance) and the y axis intercept for this  
306 break point (*i.e.* the global limit for  $\Psi_{\text{close}}$ ). Second, we computed the correlation value as well as the  
307 linear regression between  $\Psi_{\text{close}}$  and embolism resistance for the data on either side of the break point.  
308 In addition to the results developed in the main manuscript, we provided a separate analysis per group  
309 (gymnosperm and angiosperm) and per trait ( $\psi_{50}$ ,  $\psi_{12}$ ,  $\psi_{g_s90}$ ,  $\psi_{\text{tip}}$ ) in Table S2. All parameters used in  
310 this study are given in a supplementary Excel file.

## 311 **2 Model: description, simulation and validation**

312 We used a simplify discrete-time-hydraulic-model (called Sur\_Eau) to simulate the time until  
313 hydraulic failure for the spectrum of embolism resistance reported in our database, and according to  
314 different hypothesis regarding the stomatal regulation of transpiration. Sur\_Eau relies on the principle of  
315 the original Sperry's model [19] but has been simplified to consider only two resistances (rhizosphere  
316 and plant). This simplicity makes easier its applicability with only one stem VC and avoids making

317 assumptions on hydraulic segmentation, a phenomenon that depends on mechanisms that are still  
318 controversial.

### 319 *2.1 Description of the Sur\_Eau model*

320 Sur\_Eau assumes that liquid water flow through the soil-plant system is exactly compensated  
321 by gaseous water losses at the plant foliage surface (i.e. steady state condition) which is true at large  
322 time steps (>1day) or for small plants. The assumption is also made that leaf and air temperatures are  
323 roughly equal, which is reasonable in well coupled canopies. We can then write :

$$E = g_l \times VPD = k_{sl} \times (\Psi_{soil} - \Psi_{plant}) \quad (2)$$

324 where  $g_l$  is the leaf conductance to vapor water, VPD is the vapor pressure deficit at the leaf  
325 surface,  $\Psi_{soil}$  is the soil water potential,  $\Psi_{plant}$  is plant water potential, and  $K_{sl}$  is the plant leaf area specific  
326 hydraulic conductance over the soil to leaf pathway.  $g$  includes both the stomatal, cuticular and boundary  
327 layer conductances of the leaf. The control of E through stomata has been treated through different  
328 assumptions that are described below (Appendix 3).  $k_{sl}$  was computed as the result of two conductances  
329 in series:

$$k_{sl} = \frac{1}{\frac{1}{k_{soil}} + \frac{1}{k_{plant}}} \quad (3)$$

330 where  $k_{soil}$  is the hydraulic conductance of the soil to root surface pathway and  $k_{plant}$  the  
331 hydraulic conductance of the whole plant (i.e. from the roots to the leaves).

332  $k_{plant}$  was allowed to vary only to account for loss of hydraulic conductivity caused by xylem  
333 embolism [55] :

$$k_{plant} = k_{pini}(1 - PLC) \quad (4)$$

334 where  $k_{pini}$  is the initial (i.e pre-drought) plant hydraulic conductance, and PLC is the percent  
335 loss of plant hydraulic conductance due to xylem embolism. PLC is computed at each time step by using  
336 the sigmoidal function for the vulnerability curve (VC) to embolism (see equations 1 to 3).

337 The model considers the capacitive effect of xylem embolism and symplasm dehydration. The  
338 water freed by air filling of the *apoplastic* reservoir feeds the water stream of the system and thus dampen  
339 the water potential decrease [56]. Following <sup>24</sup>, we considered that any change in PLC is followed by a  
340 proportional change of the water volume that is freed back to the system:

$$W_{xv} = V_X \times PLC \quad (5)$$

341 Where  $W_{xv}$  is the amount of water freed to the system and  $V_x$  is the total water filled xylem  
 342 volume of the plant ( $m^3$ ) and PLC is defined in Equation 1.  $V_x$  was computed as:

$$V_x = E_{max} \times G \times \alpha_f \quad (6)$$

343 Where  $E_{max}$  is the maximum diurnal transpiration,  $\alpha_f$  is the apoplastic fraction of the plant and  
 344  $G$  is the ratio of the total amount of water in the xylem conduits of a tree (*i.e.* apoplastic volume) to the  
 345 maximum diurnal transpiration. The capacitive effect of cavitation on plant survival is mainly sensitive to  
 346  $G$  factor and its range of variation. The effect of  $G$  on cavitation dynamics is discussed in<sup>24</sup>. We also  
 347 accounted for the capacitive effect of symplasm dehydration (*i.e.* the water released by the symplasmic  
 348 tissue  $W_{sv}$ ) by using the same formulation as for cavitation (Equation 6). Computations were based on  
 349 the symplasmic fraction ( $1 - \alpha_f$ ) of the plant and PLC was replaced by the relative water content of the  
 350 symplasm ( $R_s$ ).  $R_s$  was computed from  $\psi_{leaf}$  by using the pressure volume curve equations (Appendix  
 351 3).

352 The variations of the soil and the rhizosphere conductance ( $k_{soil}$ ), as well as the mean soil water  
 353 potential in the root zone are computed with Van-Genuchten-Mualem equations [33,57] from the  
 354 unsaturated hydraulic conductivity of the soil, scaled to the rhizosphere according to the Gardner-Cowan  
 355 formulation [58,59]. The rhizosphere conductance ( $k_{soil}$ ) can be expressed as:

$$k_{soil} = B \cdot K_{soil}(\theta) \quad (7)$$

356 where  $K_{soil}$  is the unsaturated hydraulic conductivity of the soil at given water content ( $\theta$ ) or water  
 357 potential (see below), and  $B$  is the root density conductance factor that accounts for the length and  
 358 geometry of the root system.  $B$  is based on the implicit assumption of a uniform roots distribution in a  
 359 soil layer following the Gardner-Cowan formulation<sup>28</sup>.  $B$  is also called the “single root” approach [60] as  
 360 it is equivalent to assuming that plant water uptake occurs from a unique cylindrical root that has access  
 361 to a surrounding cylinder of soil :

$$B = \frac{2\pi L_a}{\ln\left(\frac{b}{r}\right)} \quad \text{with} \quad b = \frac{1}{\sqrt{\pi L_v}} \quad (8)$$

362 where  $L_a$  is the root length per unit area,  $r$  is the mean root radius, and  $b$  is the half of mean  
 363 distance between neighboring roots.  $b$  can be evaluated from  $L_v$ , the root length per unit soil volume.  
 364  $k_{soil}$  decreases with decreasing  $\Psi_{soil}$  because of the displacement of water filled pores by air, as capillary  
 365 forces linking water to soils particles fail with increasing tension, thus creating dry non-conductive zones  
 366 in the rhizosphere. The parametric formulation of<sup>25</sup> for the water retention curve was used in combination  
 367 with the equation of Mualem (1976)<sup>26</sup> to compute  $\Psi_{soil}$  and the unsaturated hydraulic conductivity of the  
 368 soil ( $K_{soil}$ ) as a function of soil relative extractable water content ( $\theta$ )<sup>25</sup>. The formulation of  $\Psi_{soil}(\theta)$  is as  
 369 follows:

$$\psi_{soil} = \frac{\left(\left(\frac{1}{\theta}\right)^{1/m} - 1\right)^{1/n}}{\alpha} \quad \text{and } m = 1 - \frac{1}{n} \quad (9)$$

370 where  $m$ ,  $n$  and  $\alpha$  are empirical parameters describing the typical sigmoidal shape of the  
 371 function. Mualem (1976) provides the formulation for the evolution of hydraulic conductivity with soil water  
 372 content  $k_{soil}(\theta)$ :

$$k_{soil} = K_s \cdot \theta^l \cdot \left[1 - \left(1 - \theta^{1/m}\right)^m\right]^2 \quad (10)$$

373 where  $K_s$  is the saturated hydraulic conductivity,  $l$  is a parameter describing the pore structure  
 374 of the material (usually set to 0.5), and  $m$  is again fixed as in Equation 11. The relative extractable water  
 375 content ( $\theta$ ) is expressed as a function of volumetric soil water content as follows:

$$\theta = \left(\frac{\theta - \theta_r}{\theta_s - \theta_r}\right) \quad (11)$$

376 where  $\theta$ ,  $\theta_s$  and  $\theta_r$  are the actual relative soil water content and the relative soil water content at  
 377 saturation and at wilting point respectively.  $\theta_s$  and  $\theta_r$  are parameters measured in laboratory or derived  
 378 from soil surveys using pedotransfert functions. By contrast,  $\theta$  is a variable, dynamically changing with  
 379 changes of the soil water reserve (WR). The water reserve depends on the soil volume  $\theta_s$  and  $\theta_r$ . The  
 380 calibration and sensitivity analysis for all parameters is provided below (Appendix4).

## 381 2.2 Dynamic simulations

382 Dynamic simulations of the different variables were performed by the mean of the discrete time  
 383 model described above. Under well-watered conditions, transpiration ( $E$ ) is forced at a constant value,  
 384 assuming a constant high vapor pressure deficit. Then,  $E$  is regulated with decreasing water potential  
 385 as leaves loose turgor inducing stomata closure, with a submodule based on the pressure volume curve  
 386 (following [32]; see Appendix 3). At each time step the soil water reserve (WR) is first computed and  
 387 then used to compute all other variables. WR is then computed as a result of a water balance:

$$WR_{t+1} = WR_t - (E + W_{xv} + W_{sv}) \quad (12)$$

388 Where  $E$  is the cumulated transpiration over the time step,  $W_{xv}$  is water release due to cavitation  
 389 and  $W_{sv}$  is the water release due to symplasm dehydration (Equation 7 & 8 and the following text). The  
 390 time step was set to 0.1 day, but increasing this value up to 0.5 or down to lower values had little  
 391 influence on the general pattern of our results.  $E$  was computed as follows:

$$E = [E_{max} \cdot f(\psi_{plant})] \times LA \quad (13)$$

392 where  $E_{\max}$  is the maximal rate of transpiration, LA is the plant leaf area and  $f(\psi_{\text{plant}})$  represents  
393 the stomatal regulation which was set according to different hypothesis as described in the next section  
394 (Appendix 2). The calibration for  $E_{\max}$  and LA as well as all other parameters are provided in Appendix  
395 4.

### 396 *2.3 Hypothesis testing on the interrelation between $\psi_{\text{close}}$ and $\psi_{50}$*

397 We used the above described model to evaluate the role of  $\psi_{\text{close}}$  and  $\psi_{50}$  in determining the  
398 survival time until hydraulic failure under drought for the full range of embolism resistance reported in  
399 the database. Three different hypotheses regarding how stomata regulate transpiration were tested  
400 (Figure 2A): (1) No stomatal regulation of  $E$  ( $\psi_{\text{close}}=-\infty$ ) whatever the embolism resistance, (2)  $E$   
401 regulation to maintain  $\psi_{\text{plant}}$  above the water potential causing the onset of embolism ( $\psi_{\text{plant}} > \psi_{12}$ ) and  
402 (3) Early stomatal regulation of  $E$  during drought, so that  $\psi_{\text{close}}$  varied with  $\psi_{12}$  until  $\psi_{\text{close}}=-3$  MPa, in  
403 accordance with the global limit observed in empirical data (Figure 1c, main manuscript). For each of  
404 these hypothesis, survival time was computed for the full range of embolism resistance encountered in  
405 our database, from  $\psi_{50}=-1.5$  to  $\psi_{50}=-15$  MPa, every 1MPa step. A more detailed analysis of these  
406 simulations is given in the Appendix 2.

### 407 *2.4 Model validation: survival time during drought from drought mortality experiments*

408 To validate the relationship between embolism resistance traits ( $\psi_{50}$ ) and survival time predicted  
409 by the model under different hypothesis, with used data from drought mortality experiments. We found  
410 survival time data for 15 species covering a wide range of embolism resistance ( $\psi_{50}$  from -1.5 to -11),  
411 from four different drought mortality experiments published recently [29–31,50]. One study was  
412 performed on gymnosperm species only<sup>17</sup> and three other studies were performed on angiosperm  
413 species [29–31,50]. All these experiments were made under semi-controlled conditions on potted  
414 seedlings or saplings and shoot death was recorded at different time since the beginning of an  
415 experimentally imposed drought. Here we used the average time needed to reach 50% death ( $T_{50}$ ) after  
416 the beginning of the drought treatment as an indicator of survival time during drought. In each  
417 experiment, identical soil volume and climate were used across species. However, there were  
418 differences in air relative humidity and soil volume across experiments (both of them can strongly affect  
419 the survival time during a water deficit episode), particularly between the gymnosperm and all  
420 angiosperm experiments. This precluded the direct comparison of the survival time across the four  
421 different studies. To overcome this problem, we standardized the  $T_{50}$  of each experiment by differences  
422 in soil volume or air relative humidity (Appendix1).

423



424 **REFERENCES**

- 425 1. Allen CD, Macalady AK, Chenchouni H, Bachelet D, McDowell N, Vennetier M, et al. A global  
426 overview of drought and heat-induced tree mortality reveals emerging climate change risks for  
427 forests. *For Ecol Manage.* Elsevier B.V.; 2010;259: 660–684. doi:10.1016/j.foreco.2009.09.001
- 428 2. Carnicer J, Coll M, Ninyerola M, Pons X, Sanchez G, Penuelas J. Widespread crown condition  
429 decline, food web disruption, and amplified tree mortality with increased climate change-type  
430 drought RID D-9704-2011. *Proc Natl Acad Sci U S A.* 2011;108: 1474–1478.  
431 doi:10.1073/pnas.1010070108
- 432 3. Park Williams A, Alle1. Park Williams, a. et al. Temperature as a potent driver of regional forest  
433 drought stress and tree mortality. *Nat. Clim. Chang.* 3, 292–297 (2012).n CD, Macalady AK,  
434 Griffin D, Woodhouse C a., Meko DM, et al. Temperature as a potent driver of regional forest  
435 drought stress and tree mortality. *Nat Clim Chang.* Nature Publishing Group; 2012;3: 292–297.  
436 doi:10.1038/nclimate1693
- 437 4. Ciais P, Reichstein M, Viovy N, Granier A, Ogée J, Allard V, et al. Europe-wide reduction in  
438 primary productivity caused by the heat and drought in 2003. *Nature.* Nature Publishing Group;  
439 2005;437: 529–33. doi:10.1038/nature03972
- 440 5. Anderegg WRL, Kane JM, Anderegg LDL. Consequences of widespread tree mortality triggered  
441 by drought and temperature stress. *Nat Clim Chang.* Nature Publishing Group; 2012;3: 30–36.  
442 doi:10.1038/nclimate1635
- 443 6. Anderegg WRL, Klein T, Bartlett M, Sack L, Pellegrini AFA, Choat B, et al. Meta-analysis reveals  
444 that hydraulic traits explain cross-species patterns of drought-induced tree mortality across the  
445 globe. *Proc Natl Acad Sci.* 2016;113: 5024–5029. doi:10.1073/pnas.1525678113
- 446 7. Choat B, Jansen S, Brodribb TJ, Cochard H, Delzon S, Bhaskar R, et al. Global convergence in  
447 the vulnerability of forests to drought. *Nature.* 2012;491: 752–5. doi:10.1038/nature11688
- 448 8. Klein T. The variability of stomatal sensitivity to leaf water potential across tree species indicates  
449 a continuum between isohydric and anisohydric behaviours. Niu S, editor. *Funct Ecol.* 2014;28:  
450 1313–1320. doi:10.1111/1365-2435.12289
- 451 9. McDowell NG, Fisher RA, Xu C, Domec JC, Hölttä T, Mackay DS, et al. Evaluating theories of  
452 drought-induced vegetation mortality using a multimodel-experiment framework. *New Phytol.*  
453 2013;200: 304–21. doi:10.1111/nph.12465
- 454 10. Flexas J, Medrano H. Drought-inhibition of photosynthesis in C-3 plants: Stomatal and non-  
455 stomatal limitations revisited. *Ann Bot.* 2002;89: 183–189.
- 456 11. Sperry JS. Coordinating stomatal and xylem functioning - an evolutionary perspective. *New*

- 457           Phytol. 2004;162: 568–570. doi:10.1111/j.1469-8137.2004.01072.x
- 458    12.    Cruziat P, Cochard H, Améglio T. Hydraulic architecture of trees: main concepts and results.  
459           Ann For Sci. 2002;59: 723–752. doi:10.1051/forest:2002060
- 460    13.    Lens F, Picon-Cochard C, Delmas C EL, Signarbieux C, Buttler A, Cochard H, et al. Herbaceous  
461           angiosperms are not more vulnerable to drought-induced embolism than angiosperm trees. Plant  
462           Physiol. 2016; pp.00829.2016. doi:10.1104/pp.16.00829
- 463    14.    Maherali HA, Pockman WTWiTP, Jackson RB. Adaptive variation in the vulnerability of woody  
464           plants to xylem cavitation. Ecology. 2004;85: 2184–2199. doi:10.1890/02-0538
- 465    15.    Pittermann J, Stuart S a, Dawson TE, Moreau A. Cenozoic climate change shaped the  
466           evolutionary ecophysiology of the Cupressaceae conifers. Proc Natl Acad Sci. 2012;109: 9647–  
467           9652. doi:10.1073/pnas.1114378109
- 468    16.    Larter M, Brodribb TJ, Pfautsch S, Burrell R, Cochard H, Delzon S. Extreme Aridity Pushes Trees  
469           to Their Physical Limits. Plant Physiol. 2015;168: 804–807. doi:10.1104/pp.15.00223
- 470    17.    Tyree MT, Sperry JS. Do woody plants operate near the point of catastrophic xylem dysfunction  
471           caused by dynamic water stress? : answers from a model. Plant Physiol. 1988;88: 574–80. doi:  
472           10.1104/pp.88.3.574
- 473    18.    Jones HG, Sutherland RA. Stomatal control of xylem embolism. Plant Cell Environ. 1991;18:  
474           189–196. doi:10.1111/j.1365-3040.1991.tb01532.x
- 475    19.    Sperry JS, Adler FR, Campbell GS, Comstock JP. Limitation of plant water use by rhizosphere  
476           and xylem conductance: results from a model. Plant, Cell Environ. 1998;21: 347–359.  
477           doi:10.1046/j.1365-3040.1998.00287.x
- 478    20.    Bartlett MK, Klein T, Jansen S, Choat B, Sack L. The correlations and sequence of plant  
479           stomatal, hydraulic, and wilting responses to drought. Proc Natl Acad Sci. 2016;113: 13098–  
480           13103. doi:10.1073/pnas.1604088113
- 481    21.    Torres-Ruiz JM, Jansen S, Choat B, McElrone AJ, Cochard H, Brodribb TJ, et al. Direct X-Ray  
482           microtomography observation confirms the induction of embolism upon xylem cutting under  
483           tension. Plant Physiol. 2015;167: 40–43. doi:10.1104/pp.114.249706
- 484    22.    Choat B, Brodersen CR, Mcelrone AJ. Synchrotron X-ray microtomography of xylem embolism  
485           in Sequoia sempervirens saplings during cycles of drought and recovery. 2014;
- 486    23.    Cochard H, Delzon S, Badel E. X-ray microtomography (micro-CT): A reference technology for  
487           high-resolution quantification of xylem embolism in trees. Plant, Cell Environ. 2015;38: 201–206.  
488           doi:10.1111/pce.12391

- 489 24. Cochard H, Badel E, Herbette S, Delzon S, Choat B, Jansen S. Methods for measuring plant  
490 vulnerability to cavitation: a critical review. *J Exp Bot.* 2013;64: 4779–4791.  
491 doi:10.1093/jxb/ert193
- 492 25. Franks PJ, Cowan IR, Tyerman SD, Cleary a. L, Lloyd J, Farquhar GD. Guard cell  
493 pressure/aperture characteristics measured with the pressure probe. *Plant, Cell Environ.*  
494 1995;18: 795–800. doi:10.1111/j.1365-3040.1995.tb00583.x
- 495 26. Buckley TN. The control of stomata by water balance. *New Phytol.* 2005;168: 275–291.  
496 doi:10.1111/j.1469-8137.2005.01543.x
- 497 27. Rodriguez-Dominguez CM, Buckley TN, Egea G, de Cires A, Hernandez-Santana V, Martorell  
498 S, et al. Most stomatal closure in woody species under moderate drought can be explained by  
499 stomatal responses to leaf turgor. *Plant Cell Environ.* 2016;39: 2014–2026.  
500 doi:10.1111/pce.12774
- 501 28. Brodrribb TJ, Cochard H. Hydraulic Failure Defines the Recovery and Point of Death in Water-  
502 Stressed Conifers RID B-9707-2011. *Plant Physiol.* 2009;149: 575–584.  
503 doi:10.1104/pp.108.129783
- 504 29. Urli M, Porte AJ, Cochard H, Guengant Y, Burlett R, Delzon S. Xylem embolism threshold for  
505 catastrophic hydraulic failure in angiosperm trees. *Tree Physiol.* 2013;33: 672–683.  
506 doi:10.1093/treephys/tpt030
- 507 30. Li S, Feifel M, Karimi Z, Schuldt B, Choat B, Jansen S. Leaf gas exchange performance and the  
508 lethal water potential of five European species during drought. Tognetti R, editor. *Tree Physiol.*  
509 2015;36: 179–192. doi:10.1093/treephys/tpv117
- 510 31. Barigah TS, Charrier O, Douris M, Bonhomme M, Herbette S, Améglio T, et al. Water stress-  
511 induced xylem hydraulic failure is a causal factor of tree mortality in beech and poplar. *Ann Bot.*  
512 2013;112: 1431–1437. doi:10.1093/aob/mct204
- 513 32. Vitali M, Cochard H, Gambino G, Ponomarenko A, Perrone I, Lovisolo C. VvPIP2;4N aquaporin  
514 involvement in controlling leaf hydraulic capacitance and resistance in grapevine. *Physiol Plant.*  
515 2016;158: 284–296. doi:10.1111/ppl.12463
- 516 33. van Genuchten MT. A closed-form equation for predicting the hydraulic conductivity of  
517 unsaturated soils. *Soil Sci Soc Am J.* 1980;44: 892.  
518 doi:10.2136/sssaj1980.03615995004400050002x
- 519 34. Campbell GS. A simple method for determining unsaturated conductivity from moisture retention  
520 data. *Soil Sci.* 1974;117: 311–314. doi:10.1097/00010694-197406000-00001
- 521 35. McDowell N, Pockman WT, Allen CD, Breshears DD, Cobb N, Kolb T, et al. Mechanisms of plant

- 522 survival and mortality during drought: why do some plants survive while others succumb to  
523 drought? *New Phytol.* 2008;178: 719–39. doi:10.1111/j.1469-8137.2008.02436.x
- 524 36. Skelton RP, West AG, Dawson TE. Predicting plant vulnerability to drought in biodiverse regions  
525 using functional traits. *Proc Natl Acad Sci.* 2015;112: 5744–5749. doi:10.1073/pnas.1503376112
- 526 37. Martínez-Vilalta J, Garcia-Forner N. Water potential regulation, stomatal behaviour and hydraulic  
527 transport under drought: deconstructing the iso/anisohydric concept. *Plant Cell Environ.*  
528 2016;8193. doi:10.1111/pce.12846
- 529 38. Martinez-Vilalta J, Poyatos R, Aguad D, Retana J, Mencuccini M. A new look at water transport  
530 regulation in plants. *New Phytol.* 2014; doi:10.1111/nph.12912
- 531 39. Mencuccini M, Minunno F, Salmon Y, Mart J. Coordination of physiological traits involved in  
532 drought-induced mortality of woody plants. *New Phytol.* 2015;
- 533 40. Beikircher B, Ameglio T, Cochard H, Mayr S. Limitation of the Cavitron technique by conifer pit  
534 aspiration. *J Exp Bot.* 2010;61: 3385–3393. doi:10.1093/jxb/erq159
- 535 41. Pammenter NW, Vander Willigen C. A mathematical and statistical analysis of the curves  
536 illustrating vulnerability of xylem to cavitation. *Tree Physiol.* 1998;18: 589–593. Available:  
537 <http://www.ncbi.nlm.nih.gov/pubmed/12651346>
- 538 42. Cuneo IF, Knipfer T, Brodersen CR, McElrone AJ. Mechanical failure of fine root cortical cells  
539 initiates plant hydraulic decline during drought. *Plant Physiol.* 2016;172: 1669–1678.  
540 doi:10.1104/pp.16.00923
- 541 43. Sack L, Buckley TN, Scoffoni C. Why are leaves hydraulically vulnerable? *J Exp Bot.* 2016;67:  
542 4917–4919. doi:10.1093/jxb/erw304
- 543 44. Bouche PS, Delzon S, Choat B, Badel E, Brodribb TJ, Burrett R, et al. Are needles of *Pinus*  
544 *pinaster* more vulnerable to xylem embolism than branches? New insights from X-ray computed  
545 tomography. *Plant, Cell Environ.* 2016;39: 860–870. doi:10.1111/pce.12680
- 546 45. Charrier G, Torres-Ruiz JM, Badel E, Burrett R, Choat B, Cochard H, et al. Evidence for Hydraulic  
547 Vulnerability Segmentation and Lack of Xylem Refilling under Tension. *Plant Physiol.* 2016;172:  
548 1657–1668. doi:10.1104/pp.16.01079
- 549 46. Scoffoni C, Albuquerque C, Brodersen CR, Townes S V., John GP, Cochard H, et al. Leaf vein  
550 xylem conduit diameter influences susceptibility to embolism and hydraulic decline. *New Phytol.*  
551 2016; doi:10.1111/NPH.14256
- 552 47. Boyer JS. Turgor and the transport of CO<sub>2</sub> and water across the cuticle (epidermis)  
553 of leaves. *J Exp Bot.* 2015;66: 2625–2633. doi:10.1093/jxb/erv065

- 554 48. Hinckley TM, Duhme F, Hinckley a. R, Richter H. Water relations of drought hardy shrubs:  
555 osmotic potential and stomatal reactivity. *Plant, Cell Environ.* 1980;3: 131–140.  
556 doi:10.1111/j.1365-3040.1980.tb00106.x
- 557 49. Aussenac G. Comportement hydrique de rameaux excisés de quelques espèces de sapins et  
558 de pins noirs en phase de dessiccation. *Ann des Sci For.* 1980;37: 201–215.  
559 doi:10.1051/forest:19800303
- 560 50. Brodribb TJ, Cochard H. Hydraulic failure defines the recovery and point of death in water-  
561 stressed conifers. *Plant Physiol. American Society of Plant Biologists;* 2009;149: 575–84.  
562 doi:10.1104/pp.108.129783
- 563 51. Tyree MT, Hammel HT. The Measurement of the turgor pressure and the water relations of plants  
564 by the pressure-bomb technique. *J Exp Bot.* 1972;23: 267–282. doi:10.1093/jxb/23.1.267
- 565 52. Bartlett MK, Scoffoni C, Sack L. The determinants of leaf turgor loss point and prediction of  
566 drought tolerance of species and biomes: A global meta-analysis. *Ecol Lett.* 2012;15: 393–405.  
567 doi:10.1111/j.1461-0248.2012.01751.x
- 568 53. Bartlett MK, Scoffoni C, Ardy R, Zhang Y, Sun S, Cao K, et al. Rapid determination of  
569 comparative drought tolerance traits: Using an osmometer to predict turgor loss point. *Methods*  
570 *Ecol Evol.* 2012;3: 880–888. doi:10.1111/j.2041-210X.2012.00230.x
- 571 54. Sjöman H, Hirons AD, Bassuk NL. Urban forest resilience through tree selection-Variation in  
572 drought tolerance in *Acer*. *Urban For Urban Green.* 2015;14: 858–865.  
573 doi:10.1016/j.ufug.2015.08.004
- 574 55. Tyree MT, Ewers FW. The hydraulic architecture of trees and other woody plants. *New Phytol.*  
575 1991;119: 345–360. doi:10.1111/j.1469-8137.1991.tb00035.x
- 576 56. Hölttä T, Cochard H, Nikinmaa E, Mencuccini M. Capacitive effect of cavitation in xylem conduits:  
577 results from a dynamic model. *Plant Cell Environ.* 2009;32: 10–21. doi:10.1111/j.1365-  
578 3040.2008.01894.x
- 579 57. Mualem Y. A new model for predicting the hydraulic conductivity of unsaturated porous media.  
580 *Water Resour Res Vol 12, No 1, pp57-64.* 1976;12.
- 581 58. Gardner WR. Relation of Root Distribution to Water Uptake and Availability<sup>1</sup>. *Agron J.* 1964;56:  
582 41. doi:10.2134/agronj1964.00021962005600010013x
- 583 59. Cowan IR. Transport of water in the soil-plant-atmosphere continuum. *J Appl Ecol.* 1965;2: 221–  
584 239.
- 585 60. Tardieu F, Bruckler L, Lafolie F. Root clumping may affect the root water potential and the

586 resistance to soil-root water transport. *Plant Soil*. 1992;140: 291–301. doi:10.1007/BF00010606

587

588 **Appendix and SUPPLEMENTARY MATERIAL:**

589

590 **Appendix and includes:**

591 **Appendix 1:** Methods for obtaining survival time during drought for model validation

592 **Appendix 2:** Detailed simulations of the three hypothesis tested for the stomata regulation of  
593 embolism.

594 **Appendix 3:** Turgor loss model and symplasm water content simulation

595 **Appendix 4:** Model parameterization and sensitivity analysis

596 **Supplementary material includes**

597 **Table S1:** Summary description of the data collected

598 **Table S2:** correlation and linear regression between  $\Psi_{close}$ ,  $\Psi_{tip}$ ,  $\Psi_{gs90}$  and embolism  
599 resistance ( $\Psi_{12}$ ,  $\Psi_{50}$ ) on either side of the breakpoints for all species or gymnosperm and  
600 angiosperm separately.

601 **Excel file of database of stomatal and stem hydraulic traits**
